# Supplementary material for: A ratiometric fluorescence assay for the detection of DNA methylation based on an alkaline phosphatase triggered in situ fluorogenic reaction
Source: Royal Society of Chemistry journal article supplement (doi:10.1039/d3an01854g), 2023-11-29
Supplement: d3an01854g1.pdf [file d3an01854g1.pdf]

**Ratiometric fluorescent assay for DNA methylation based on alkaline  
phosphatase triggered *in-situ* fluorogenic reaction**

Hongding Zhang\*, Yinhui Su, Jiamiao Zhao, Huixi Song, Xiaohong Zhou

*College of Chemistry and Chemical Engineering, Xinyang Key Laboratory of  
Functional Nanomaterials for Bioanalysis, Xinyang Normal University, Xinyang  
464000, PR China*

**Table of contents: Figure S1-5, Table S1-4.**

---

\* Corresponding author. Tel.: +86 376 6391172; Fax: +86 376 6391172.

E-mail address: [zhanghongding0606@163.com](mailto:zhanghongding0606@163.com) (H.D. Zhang).

**Table S1** The list of DNA sequence used in this work.

| Note               | Sequence (5'-3')                                  |
|--------------------|---------------------------------------------------|
| Biotin capture DNA | CTG TCC GCT CTT CCT ATT GGT TTT TTT<br>TTT-Biotin |
| MLH1-mC (MLH1)     | CCAATA GGAAGA G(mC)G GAC AG                       |
| MLH1-C             | CCAATA GGAAGA GCG GAC AG                          |
| Random-mC          | TGG AGT CCT GCA (mC)GA GAC TAG                    |
| Random-C           | TGG AGT CCT GCA CGA GAC TAG                       |

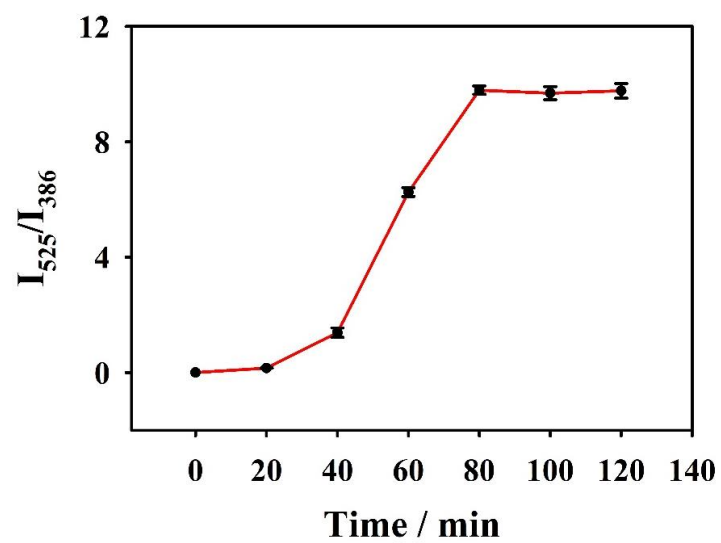

**Fig. S1** The effect of reaction time on the in-situ fluorogenic reaction between AA and 2,3-DAN. The error bars stand for three parallel experiments.

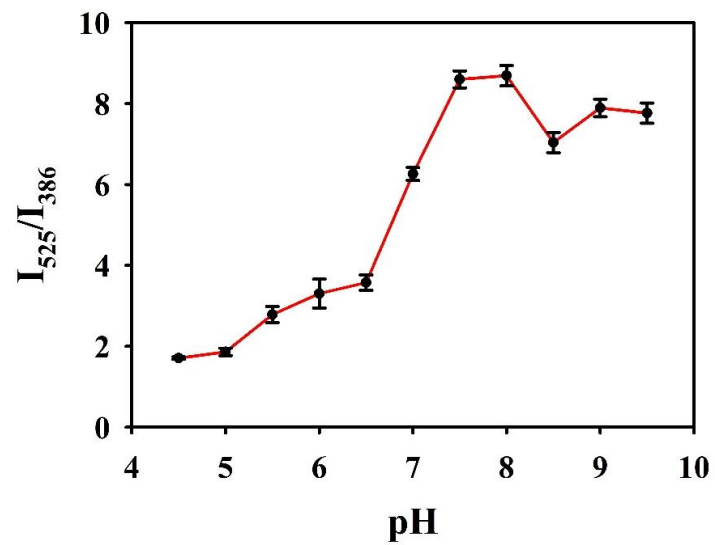

**Fig. S2** The effect of pH on the in-situ fluorogenic reaction between AA and 2,3-DAN. The error bars stand for three parallel experiments.

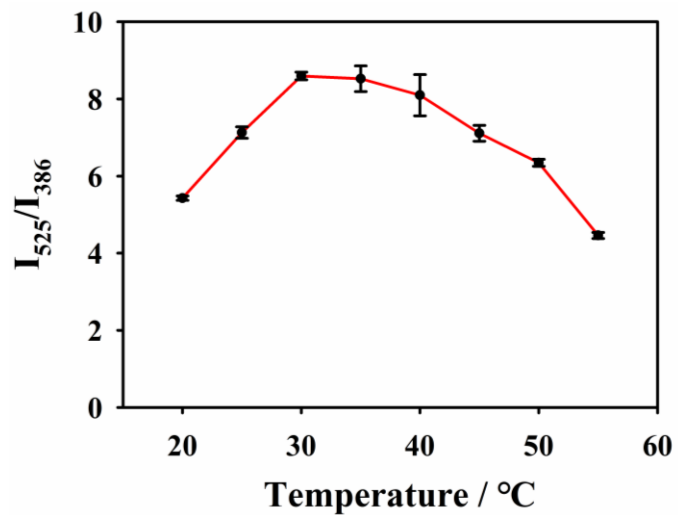

**Fig. S3** The effect of temperature on the in-situ fluorogenic reaction between AA and 2,3-DAN. The error bars stand for three parallel experiments.

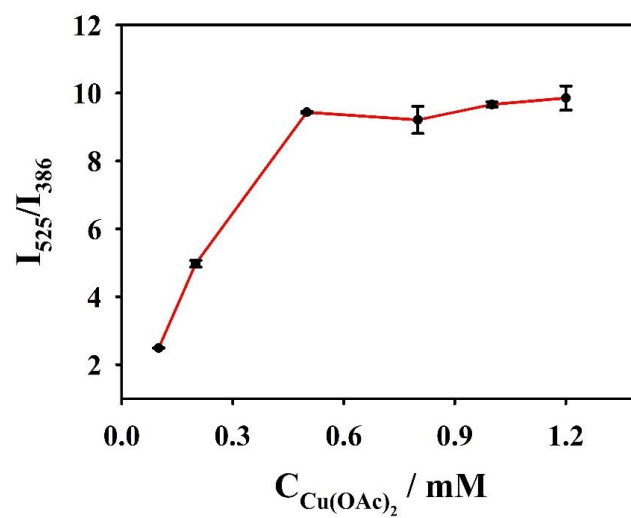

**Fig. S4** The effect of  $Cu(OAc)_2$  concentrations on the in-situ fluorogenic reaction between AA and 2,3-DAN. The error bars stand for three parallel experiments.

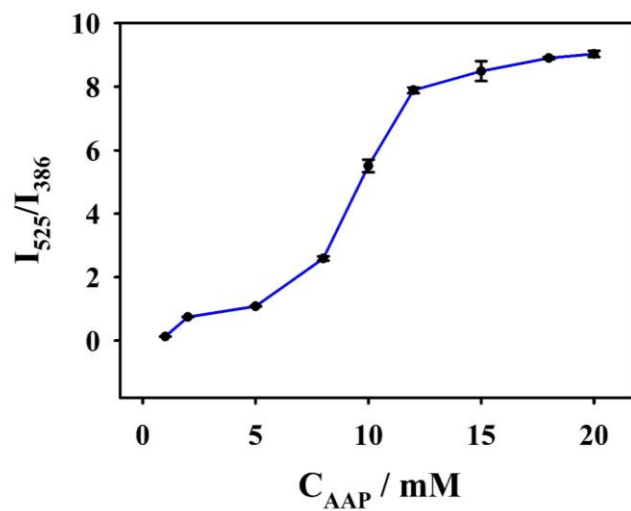

**Fig. S5** The effect of AAP concentrations on the ALP-assisted in-situ fluorogenic reaction between AA and 2,3-DAN. The error bars stand for three parallel experiments.

**Table S2** Comparisons of other fluorescent methods for ALP detection.

| Fluorescent assays                                                                                   | Determination range<br>(mU·mL <sup>-1</sup> ) | Limit of detection<br>(mU·mL <sup>-1</sup> ) | References |
|------------------------------------------------------------------------------------------------------|-----------------------------------------------|----------------------------------------------|------------|
| DNAzyme-regulated<br>CRISPR/Cas12a                                                                   | 0.05-10                                       | 0.04                                         | 1          |
| Lysozyme-functionalized<br>5-methyl-2-thiour-acil<br>gold/silver<br>nanoclusters                     | 0.5-10                                        | 0.0193                                       | 2          |
| Glutathione-stabilized<br>nanoclusters                                                               | Cu<br>0.1-200                                 | 0.02                                         | 3          |
| <i>In situ</i> fluorogenic reaction between<br>dopamine and orcinol monohydrate                      | 0-30                                          | 0.1                                          | 4          |
| <i>In situ</i> fluorogenic reaction between<br>terephthalic acid and ascorbic acid                   | 0.05-20                                       | 0.016                                        | 5          |
| ALP-triggered <i>in situ</i> fluorogenic<br>reaction between ascorbic acid and<br>o-phenylenediamine | 0.1-30                                        | 0.06                                         | 6          |
| ALP-triggered <i>in situ</i> fluorogenic<br>reaction between AA and 2,3-DAN                          | 1.0-0.1,<br>0.1-0.01                          | 0.0036                                       | This work  |



**Table S3** Comparisons of other sensing assays towards DNA methylation detection.

| Analytical methods                                                          | Linear range<br>(M)                                                                   | Detection of<br>limit<br>(M) | Reference |
|-----------------------------------------------------------------------------|---------------------------------------------------------------------------------------|------------------------------|-----------|
| Rolling circle amplification                                                | $1 \times 10^{-12}$ - $1 \times 10^{-7}$                                              | $1.42 \times 10^{-13}$       | 7         |
| Oxidation damage base based<br>amplification                                | $1 \times 10^{-13}$ - $1 \times 10^{-9}$ ,<br>$2 \times 10^{-9}$ - $1 \times 10^{-7}$ | $3.458 \times 10^{-14}$      | 8         |
| Tannic acid-accelerated fenton<br>chemical reaction amplification           | $2 \times 10^{-14}$ - $5 \times 10^{-13}$                                             | $1.4 \times 10^{-15}$        | 9         |
| 5mC antibody based<br>electrochemical bioplatfrom                           | $1.95 \times 10^{-11}$ - $9.5 \times 10^{-8}$                                         | $1.5 \times 10^{-12}$        | 10        |
| 5mC antibody based<br>electrochemiluminescence assay                        | $5 \times 10^{-13}$ - $5 \times 10^{-8}$                                              | $1 \times 10^{-13}$          | 11        |
| ALP-triggered <i>in situ</i> fluorogenic<br>reaction between AA and 2,3-DAN | $2 \times 10^{-13}$ - $1 \times 10^{-11}$                                             | $8.2 \times 10^{-14}$        | This work |

**Table S4** Analysis of methylated DNA (MHL1) content in human serum samples.

|             | Sample | Added (pM) | Found (pM) | Recovery (%) | RSD(%) |
|-------------|--------|------------|------------|--------------|--------|
| Human serum | 1      | 0.5        | 0.492      | 98.4         | 3.8    |
|             |        | 1.0        | 1.053      | 105.3        | 4.2    |
|             |        | 5.0        | 5.216      | 104.3        | 3.7    |
|             | 2      | 0.5        | 0.503      | 100.6        | 2.9    |
|             |        | 1.0        | 0.979      | 97.9         | 3.4    |
|             |        | 5.0        | 5.104      | 102.1        | 2.5    |
|             | 3      | 0.5        | 0.498      | 99.6         | 5.1    |
|             |        | 1.0        | 1.035      | 103.5        | 3.3    |
|             |        | 5.0        | 4.971      | 99.4         | 1.6    |

## Reference:

- 1 Y. Lai, M. Li, X. Liao, and L. Zou, *Anal. Chim. Acta*, 2022, **1233**, 340518.
- 2 M. Wang, X. Zhou, L. Cheng, M. Wang, and X. Su, *ACS Appl. Nano Mater.*, 2021, **4**, 9265-9273.
- 3 H. Zhang, B.-B. Tao, N.-N. Wu, L.-G. Chen, and H.-B. Wang, *Microchem. J.*, 2023, **193**, 109066.
- 4 W. Ma, L. Pang, J. Liu, L. Wen, H. Ma, Y. Li, Z. Xu, C. Zhang, and H.-D. Yu, *Anal. Chem.*, 2023, **95**, 6323-6331.
- 5 Y. Fan, M. Lv, Y. Xue, J. Li, and E. Wang, *Anal. Chem.*, 2021, **93**, 6873-6880.
- 6 D. Zhao, J. Li, C. Peng, S. Zhu, J. Sun, and X. Yang, *Anal. Chem.*, 2019, **91**, 2978-2984.
- 7 P. Yan, Y. Hao, Z. Shu, C. Gu, X. Zhou, X. Liu, and H. Xiang, *Mikrochim. Acta*, 2018, **185**, 299.
- 8 Y. Zhang, C. Li, X. Zhang, Q. Xu, and C. Zhang, *Anal. Chem.*, 2020, **92**, 10223-10227.
- 9 H. Zhang, S. Wu, Z. Song, L. Fang, and H.-B. Wang, *Talanta*, 2023, **265**, 124811.
- 10 E. Povedano, M. Gamella, R. M. Torrente-Rodríguez, V. R.-V. Montiel, A. Montero-Calle, G. Solís-Fernández-García, F. Navarro-Villoslada, M. Pedrero, A. Peláez-García, M. Mendiola, D. Harddisson, J. Feliú, R. Barderas, J. M. Pingarrón, and S. Campuzano, *Anal. Chim. Acta*, 2021, **1182**, 338946.
- 11 W. Wu, J. Wu, H. Huang, B. Qiao, C. Jiang, Y. Shi, C. Wang, H. Pei, Q. Xu, X. Wu, Q. Wu, and H. Ju, *Sens. Actuat. B-Chem.*, 2023, **375**, 132857.
